# Supplementary material for: Looped carbon capturing and environmental remediation: case study of magnetic polypropylene nanocomposites
Source: Royal Society of Chemistry journal article supplement (doi:10.1039/c2ra01150f), 2012-01-01
Supplement: c2ra01150f.pdf [file c2ra01150f.pdf]

## Supporting Materials For

### Carbon Capturing Loop and Environmental Remediation: Case Study of Magnetic Polypropylene Nanocomposites

Jiahua Zhu<sup>a,b</sup>, Hongbo Gu<sup>a</sup>, Sowjanya B. Rapole<sup>a,b</sup>, Zhiping Luo<sup>c</sup>, Sameer Pallavkar<sup>a</sup>,  
Neel Haldolaarachchige<sup>d</sup>, Tracy J. Benson<sup>a</sup>, Thomas C. Ho<sup>a</sup>, Jack Hopper,<sup>a</sup> David P.  
Young<sup>d</sup>, Suying Wei<sup>b\*</sup> and Zhanhu Guo<sup>a\*</sup>

<sup>a</sup>Integrated Composites Laboratory (ICL), Dan F. Smith Department of Chemical  
Engineering, Lamar University, Beaumont, TX 77710 USA

<sup>b</sup>Department of Chemistry and Biochemistry, Lamar University, Beaumont, TX 77710  
USA

<sup>c</sup>Microscopy and Imaging Center and Materials Science and Engineering Program, Texas  
A&M University, College Station, TX 77843 USA

<sup>d</sup>Department of Physics and Astronomy,  
Louisiana State University, Baton Rouge, LA 70803 USA

\* *Corresponding authors:*

Email: [zhanhu.guo@lamar.edu](mailto:zhanhu.guo@lamar.edu) Phone: (409) 880-7654 (Z. G.)

Email: [suying.wei@lamar.edu](mailto:suying.wei@lamar.edu) Phone: (409) 880-7976 (S.W.)

### S1. GC/MS of the Solid Components from PP and SS20

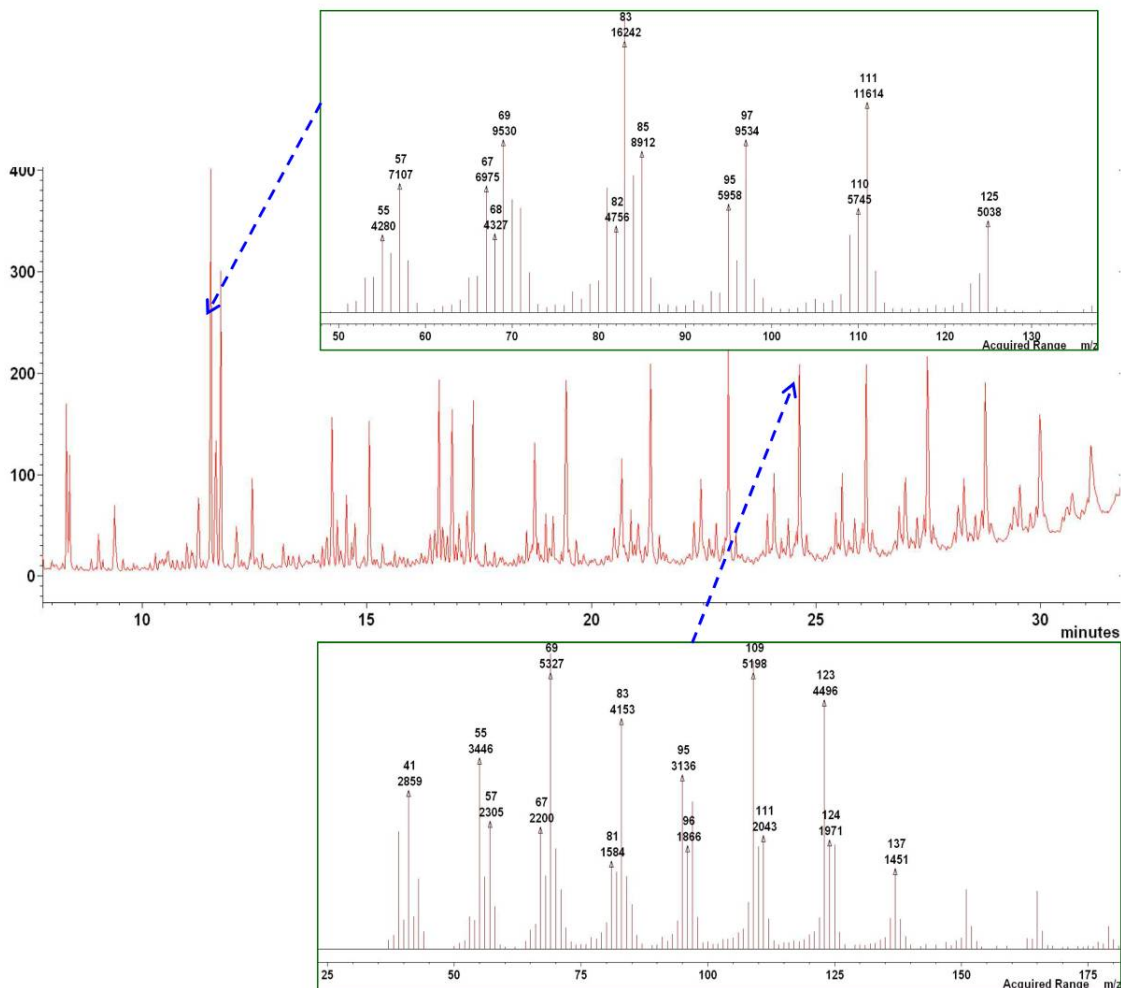

**Figure S1.** Typical GC/MS EI chromatogram for solid component after pyrolysis of the pure PP.

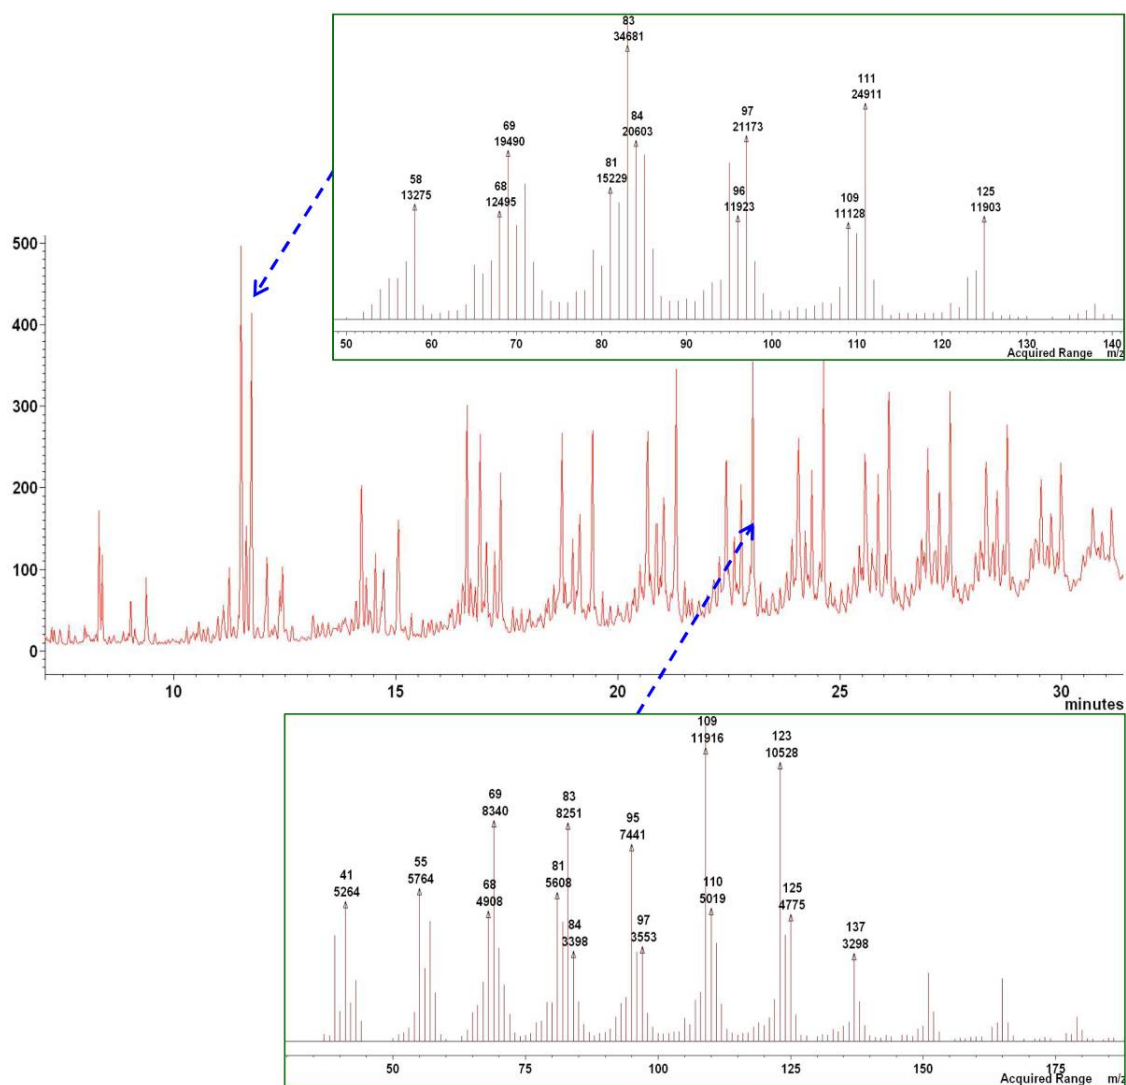

**Figure S2.** Typical GC/MS EI chromatogram for solid component after pyrolysis of the S20 PNCs.

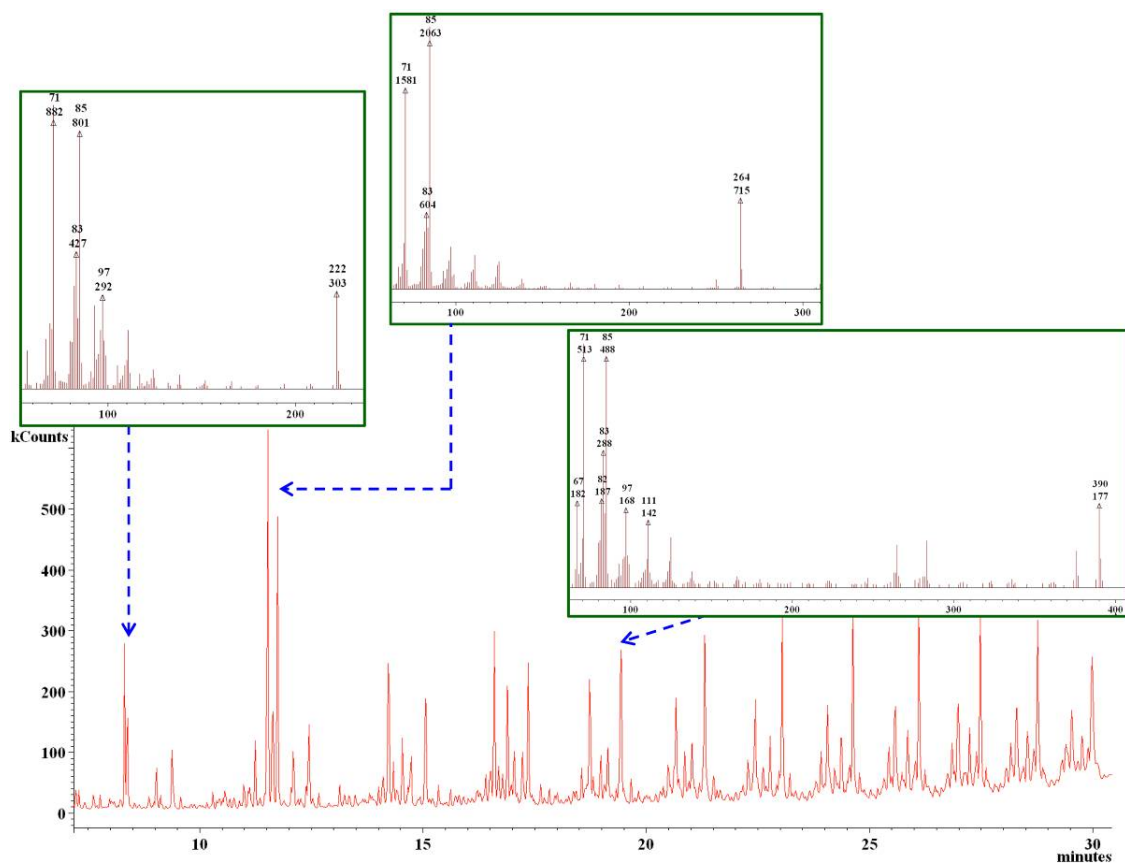

**Figure S3.** Typical GC/MS CI chromatogram for solid component after pyrolysis of the S3 PNCs.

## S2. TGA

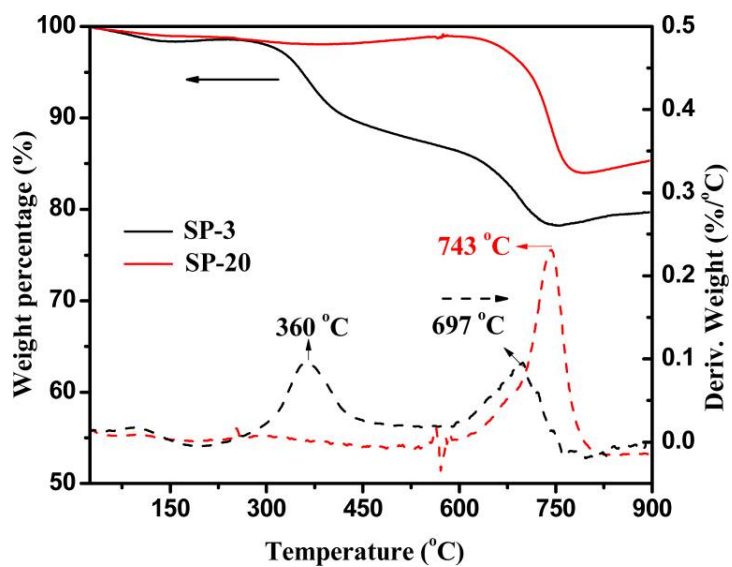

**Figure S4.** Thermogravimetric curves of the SP3 and SP20 in N<sub>2</sub> with a heating rate of 10 °C/min.

## S3. UV-vis Spectra of Cr(VI) Removal

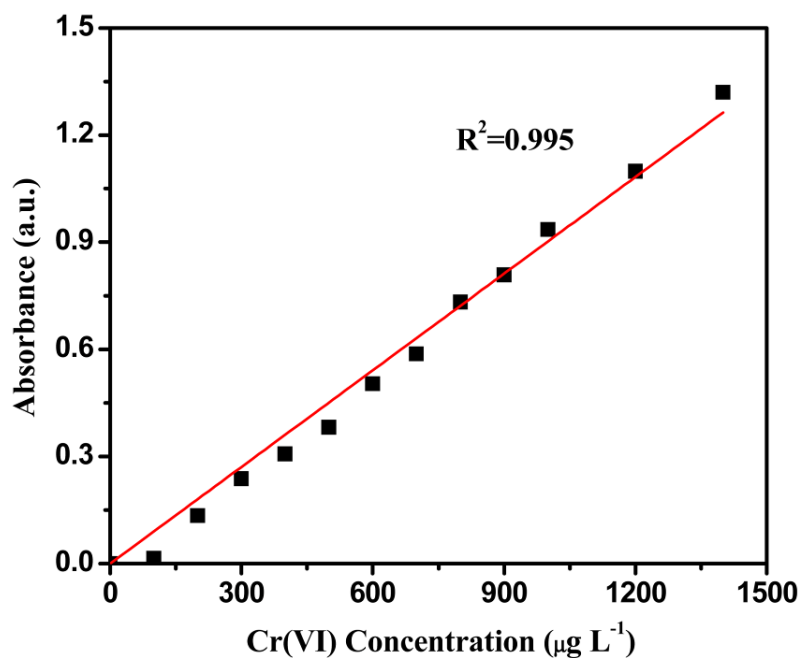

**Figure S5.** Linear relationship between the Cr(VI) concentration and UV-Vis absorption tested at room temperature. Linear equation: [Absorbance]= $9.7232\text{E-}4 \times [\text{Cr(VI)}]$ .

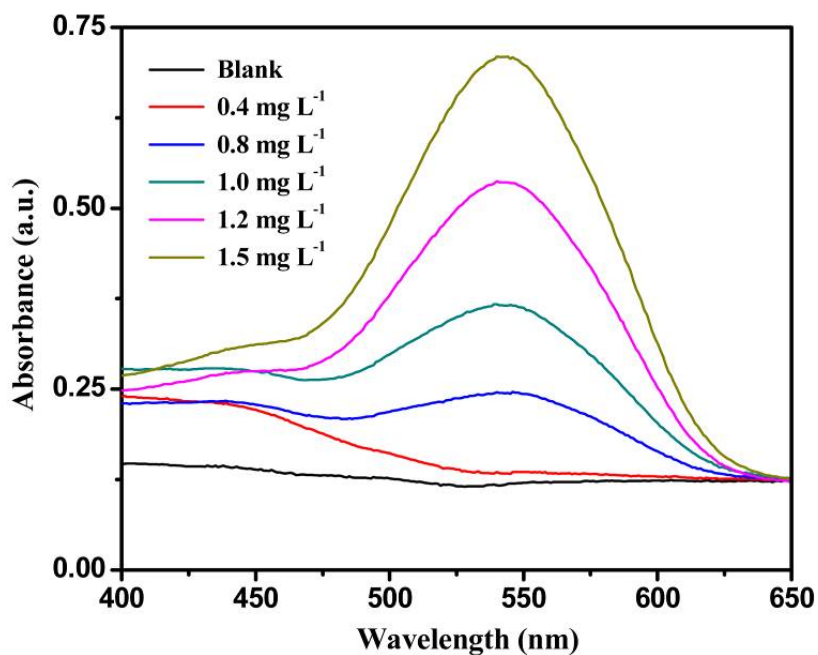

**Figure S6.** UV-vis absorption of different concentrated Cr(VI) solution after adsorption. ([SS20]= 1 g L<sup>-1</sup>, pH=7, adsorption time: 10 min)

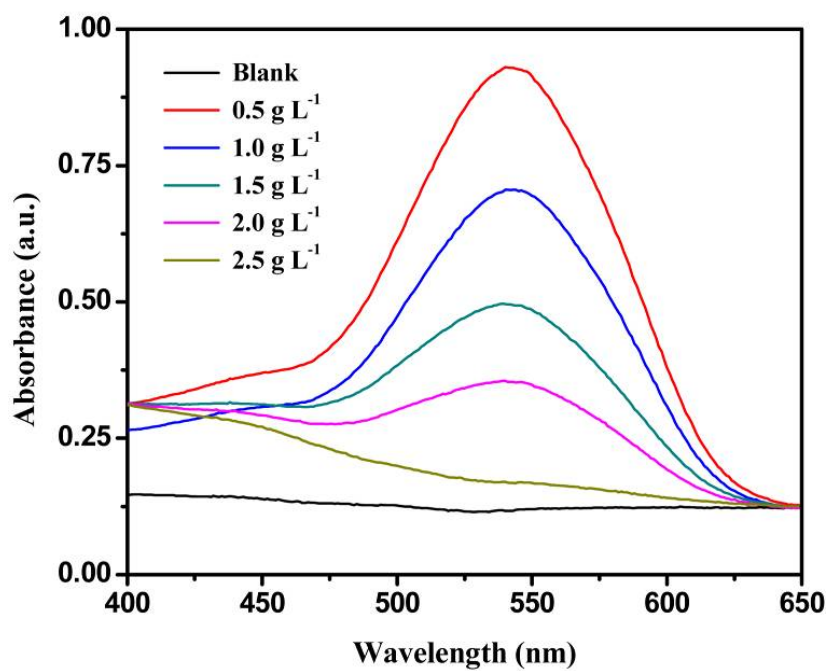

**Figure S7.** UV-vis absorption of Cr(VI) solution after treatment with different concentrations of SS20. ([Cr(VI)]=1.5 mg L<sup>-1</sup>, pH=7, treating time: 10 min)

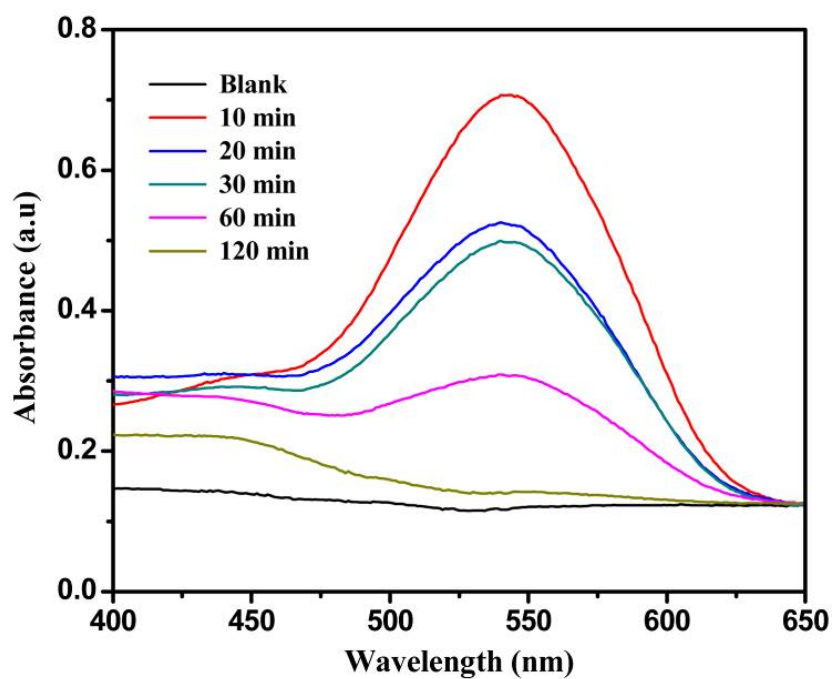

**Figure S8.** UV-vis absorption of the Cr(VI) solutions treating with different time. ([MGNCs]= 1 g L<sup>-1</sup>, [Cr(VI)]=1.5 mg L<sup>-1</sup>, pH=7)

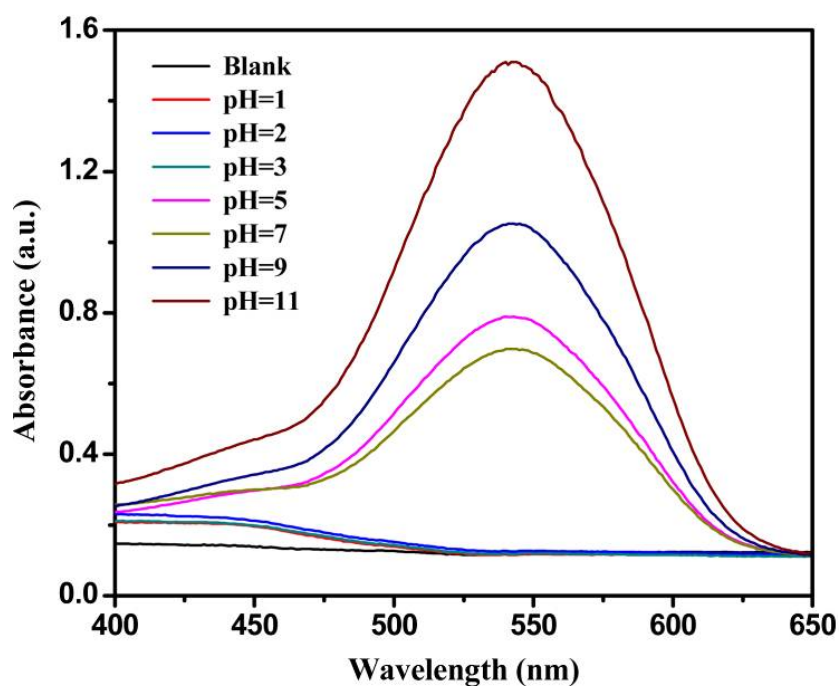

**Figure S9.** UV-vis absorption of the solutions after Cr(VI) removal in different pH conditions. ([MGNCs]= 1 g L<sup>-1</sup>, [Cr(VI)]=1.5 mg L<sup>-1</sup>, treating time: 10 min)
